# Supplementary material for: Funcao sexual da mulher na transicao menopausal: estudo transversal
Source: Royal Society of Chemistry journal article supplement (doi:10.1039/c0cp00535e), 2009-01-01
Supplement: c0cp00535e.pdf [file c0cp00535e.pdf]

**Supplementary material. New basis sets for the evaluation of  
interaction energies: An *ab initio* study of the He–He, Ne–Ne,  
Ar–Ar, He–Ne, He–Ar and Ne–Ar van der Waals complex  
intermolecular potentials and ro-vibrational spectra**

Angelika Baranowska\*, Silvia Bouzón Capelo, Berta Fernández†

*Department of Physical Chemistry, Faculty of Chemistry,*

*University of Santiago de Compostela,*

*E-15782 Santiago de Compostela, Spain*

---

\* Institute of Physics, Kazimierz Wielki University, Plac Weyssenhoffa 11, PL-85072 Bydgoszcz, Poland;  
angelika.baranowska@ukw.edu.pl

†Electronic address: berta.fernandez@usc.es

TABLE I: He<sub>2</sub> interaction energies. Symbol  $n$  denotes the number of basis functions,  $R$  is the interatomic distance. Interaction energy values in cm<sup>-1</sup>, interatomic distances in Å. See the text for basis set notation.

| $R$   | daV5Z-33221 | ds-3321    | apc2-33221 |
|-------|-------------|------------|------------|
| $n$   | 255         | 55         | 91         |
| 1.750 | 1255.69903  | 1286.01673 | 1268.18198 |
| 1.900 | 617.13066   | 635.33893  | 624.55979  |
| 2.000 | 376.64173   | 389.16379  | 381.85392  |
| 2.150 | 171.76853   | 178.40691  | 174.70099  |
| 2.250 | 97.25913    | 101.36603  | 99.16674   |
| 2.400 | 36.39188    | 38.16754   | 37.31624   |
| 2.500 | 15.56415    | 16.45305   | 16.10384   |
| 2.600 | 3.68090     | 4.02646    | 3.97791    |
| 2.700 | -2.74846    | -2.71892   | -2.60196   |
| 2.750 | -4.63954    | -4.70949   | -4.54521   |
| 2.800 | -5.91589    | -6.05702   | -5.86278   |
| 2.850 | -6.72525    | -6.91536   | -6.70477   |
| 2.900 | -7.18319    | -7.40529   | -7.18858   |
| 2.950 | -7.37990    | -7.62097   | -7.40558   |
| 2.955 | -7.38806    | -7.63043   | -7.41552   |
| 2.960 | -7.39441    | -7.63796   | -7.42353   |
| 2.965 | -7.39891    | -7.64362   | -7.42970   |
| 2.970 | -7.40172    | -7.64744   | -7.43415   |
| 2.975 | -7.40286    | -7.64952   | -7.43685   |
| 2.980 | -7.40240    | -7.64992   | -7.43789   |
| 2.985 | -7.40033    | -7.64871   | -7.43736   |
| 2.990 | -7.39682    | -7.64586   | -7.43525   |
| 3.000 | -7.38541    | -7.63563   | -7.42663   |

|       |          |          |          |
|-------|----------|----------|----------|
| 3.005 | -7.37762 | -7.62835 | -7.42015 |
| 3.010 | -7.36855 | -7.61972 | -7.41236 |
| 3.015 | -7.35817 | -7.60969 | -7.40325 |
| 3.020 | -7.34661 | -7.59843 | -7.39285 |
| 3.025 | -7.33385 | -7.58586 | -7.38122 |
| 3.030 | -7.31996 | -7.57214 | -7.36844 |
| 3.040 | -7.28886 | -7.54121 | -7.33945 |
| 3.050 | -7.25372 | -7.50601 | -7.30624 |
| 3.075 | -7.14978 | -7.40108 | -7.20654 |
| 3.100 | -7.02633 | -7.27558 | -7.08637 |
| 3.125 | -6.88694 | -7.13334 | -6.94940 |
| 3.150 | -6.73491 | -6.97771 | -6.79893 |
| 3.175 | -6.57291 | -6.81157 | -6.63770 |
| 3.200 | -6.40339 | -6.63748 | -6.46825 |
| 3.225 | -6.22840 | -6.45760 | -6.29260 |
| 3.250 | -6.04971 | -6.27384 | -6.11268 |
| 3.275 | -5.86882 | -6.08770 | -5.93003 |
| 3.300 | -5.68707 | -5.90066 | -5.74598 |
| 3.325 | -5.50554 | -5.71376 | -5.56179 |
| 3.350 | -5.32520 | -5.52806 | -5.37836 |
| 3.375 | -5.14672 | -5.34434 | -5.19659 |
| 3.400 | -4.97082 | -5.16325 | -5.01721 |
| 3.425 | -4.79804 | -4.98539 | -4.84075 |
| 3.450 | -4.62881 | -4.81115 | -4.66772 |
| 3.475 | -4.46339 | -4.64094 | -4.49857 |
| 3.500 | -4.30212 | -4.47496 | -4.33355 |
| 3.550 | -3.99279 | -4.15665 | -4.01687 |
| 3.600 | -3.70175 | -3.85713 | -3.71893 |
| 3.650 | -3.42933 | -3.57673 | -3.44029 |
| 3.700 | -3.17536 | -3.31527 | -3.18091 |

|       |          |          |          |
|-------|----------|----------|----------|
| 3.750 | -2.93942 | -3.07218 | -2.94030 |
| 3.800 | -2.72078 | -2.84672 | -2.71775 |
| 3.900 | -2.33179 | -2.44484 | -2.32334 |
| 4.000 | -2.00077 | -2.10180 | -1.98949 |
| 4.250 | -1.37701 | -1.45022 | -1.36636 |
| 4.500 | -0.96365 | -1.01244 | -0.95954 |
| 5.000 | -0.49821 | -0.50892 | -0.51019 |

TABLE II: Ne<sub>2</sub> interaction energies. See caption of Table I  
for details.

| <i>R</i> | daV5Z-33221 | fl-321    | apc2-332  |
|----------|-------------|-----------|-----------|
| <i>n</i> | 371         | 170       | 114       |
| 2.250    | 755.27857   | 788.99290 | 783.21692 |
| 2.300    | 571.72919   | 598.88918 | 594.12344 |
| 2.350    | 428.39424   | 450.12429 | 446.31705 |
| 2.450    | 230.30937   | 243.98297 | 241.75624 |
| 2.500    | 163.52736   | 174.32034 | 172.66697 |
| 2.650    | 43.56986    | 48.87689  | 48.16803  |
| 2.750    | 5.03310     | 8.27343   | 7.84108   |
| 2.755    | 3.65992     | 6.81673   | 6.39523   |
| 2.800    | -6.87509    | -4.40418  | -4.73606  |
| 2.825    | -11.48140   | -9.34562  | -9.63336  |
| 2.850    | -15.33568   | -13.50568 | -13.75307 |
| 2.900    | -21.15367   | -19.85600 | -20.03411 |
| 2.925    | -23.27452   | -22.20677 | -22.35608 |
| 2.950    | -24.95977   | -24.09972 | -24.22401 |
| 2.975    | -26.26694   | -25.59375 | -25.69668 |
| 3.000    | -27.24681   | -26.74088 | -26.82605 |
| 3.050    | -28.39852   | -28.17323 | -28.23229 |
| 3.065    | -28.56914   | -28.41516 | -28.46849 |
| 3.075    | -28.64458   | -28.53510 | -28.58512 |
| 3.085    | -28.69168   | -28.62423 | -28.67131 |
| 3.090    | -28.70515   | -28.65783 | -28.70359 |
| 3.095    | -28.71213   | -28.68443 | -28.72894 |
| 3.100    | -28.71297   | -28.70425 | -28.74756 |
| 3.105    | -28.70768   | -28.71749 | -28.75971 |
| 3.110    | -28.69662   | -28.72440 | -28.76553 |

|       |           |           |           |
|-------|-----------|-----------|-----------|
| 3.115 | -28.67991 | -28.72508 | -28.76529 |
| 3.120 | -28.65772 | -28.71979 | -28.75914 |
| 3.125 | -28.63031 | -28.70873 | -28.74727 |
| 3.130 | -28.59781 | -28.69209 | -28.72984 |
| 3.140 | -28.51823 | -28.64271 | -28.67912 |
| 3.150 | -28.42030 | -28.57309 | -28.60839 |
| 3.165 | -28.24180 | -28.43355 | -28.46759 |
| 3.175 | -28.10344 | -28.31892 | -28.35235 |
| 3.190 | -27.86968 | -28.11755 | -28.15036 |
| 3.210 | -27.51426 | -27.79971 | -27.83226 |
| 3.230 | -27.11578 | -27.43281 | -27.46556 |
| 3.250 | -26.68092 | -27.02404 | -27.05740 |
| 3.275 | -26.09534 | -26.46394 | -26.49860 |
| 3.300 | -25.47255 | -25.85955 | -25.89594 |
| 3.325 | -24.82166 | -25.22075 | -25.25918 |
| 3.350 | -24.15026 | -24.55598 | -24.59674 |
| 3.375 | -23.46502 | -23.87265 | -23.91595 |
| 3.400 | -22.77163 | -23.17711 | -23.22316 |
| 3.450 | -21.37898 | -21.77092 | -21.82267 |
| 3.500 | -20.00292 | -20.37280 | -20.43030 |
| 3.575 | -18.01498 | -18.34498 | -18.40999 |
| 3.650 | -16.15616 | -16.44730 | -16.51694 |
| 3.750 | -13.91436 | -14.16487 | -14.23482 |
| 3.850 | -11.95272 | -12.17757 | -12.24284 |
| 4.000 | -9.50527  | -9.70754  | -9.76743  |
| 4.150 | -7.57337  | -7.75338  | -7.82374  |
| 4.300 | -6.05919  | -6.21155  | -6.30902  |
| 4.500 | -4.53810  | -4.65578  | -4.79633  |
| 4.750 | -3.21396  | -3.29767  | -3.47457  |
| 5.000 | -2.31552  | -2.37869  | -2.55993  |

|       |          |          |          |
|-------|----------|----------|----------|
| 5.250 | -1.69893 | -1.74621 | -1.90190 |
| 5.500 | -1.26624 | -1.30282 | -1.41570 |
| 6.000 | -0.73458 | -0.75438 | -0.78998 |
| 6.500 | -0.44606 | -0.45771 | -0.46145 |
| 7.000 | -0.28187 | -0.29085 | -0.28835 |

---

---

TABLE III: Ar<sub>2</sub> interaction energies. See caption of Table I  
for details.

| <i>R</i> | daV5Z-33221 | fl-3321   | apc2-33211 |
|----------|-------------|-----------|------------|
| <i>n</i> | 379         | 203       | 138        |
| 3.000    | 669.35366   | 703.55422 | 708.60312  |
| 3.150    | 267.74151   | 287.87072 | 289.50334  |
| 3.250    | 112.98833   | 126.72913 | 127.11591  |
| 3.300    | 58.50680    | 69.71346  | 69.70001   |
| 3.350    | 15.73969    | 24.77294  | 24.46923   |
| 3.400    | -17.43136   | -10.25853 | -10.76881  |
| 3.450    | -42.77144   | -37.18611 | -37.84190  |
| 3.500    | -61.74842   | -57.51151 | -58.26926  |
| 3.550    | -75.57978   | -72.48038 | -73.31047  |
| 3.600    | -85.27250   | -83.12518 | -84.00708  |
| 3.650    | -91.65737   | -90.29864 | -91.21807  |
| 3.700    | -95.41741   | -94.70425 | -95.65077  |
| 3.750    | -97.11281   | -96.92015 | -97.88661  |
| 3.755    | -97.18721   | -97.04036 | -98.00857  |
| 3.760    | -97.24607   | -97.14393 | -98.11378  |
| 3.765    | -97.28968   | -97.23126 | -98.20267  |
| 3.770    | -97.31847   | -97.30274 | -98.27576  |
| 3.775    | -97.33296   | -97.35884 | -98.33328  |
| 3.780    | -97.33327   | -97.39977 | -98.37577  |
| 3.785    | -97.32001   | -97.42613 | -98.40360  |
| 3.790    | -97.29339   | -97.43813 | -98.41705  |
| 3.795    | -97.25380   | -97.43627 | -98.41653  |
| 3.800    | -97.20158   | -97.42082 | -98.40248  |
| 3.805    | -97.13719   | -97.39215 | -98.37516  |
| 3.810    | -97.06075   | -97.35067 | -98.33493  |



|       |           |           |           |
|-------|-----------|-----------|-----------|
| 3.820 | -96.87331 | -97.23036 | -98.21720 |
| 3.830 | -96.64203 | -97.06257 | -98.05189 |
| 3.840 | -96.36918 | -96.84981 | -97.84153 |
| 3.850 | -96.05711 | -96.59449 | -97.58865 |
| 3.860 | -95.70795 | -96.29899 | -97.29543 |
| 3.870 | -95.32389 | -95.96546 | -96.96422 |
| 3.880 | -94.90713 | -95.59595 | -96.59717 |
| 3.890 | -94.45927 | -95.19278 | -96.19628 |
| 3.900 | -93.98248 | -94.75773 | -95.76352 |
| 3.910 | -93.47839 | -94.29273 | -95.30089 |
| 3.925 | -92.67498 | -93.54296 | -94.55470 |
| 3.950 | -91.22287 | -92.16820 | -93.18592 |
| 3.975 | -89.64957 | -90.65790 | -91.68193 |
| 4.000 | -87.97566 | -89.03427 | -90.06471 |
| 4.050 | -84.39857 | -85.52393 | -86.56744 |
| 4.075 | -82.52652 | -83.67084 | -84.72061 |
| 4.100 | -80.61674 | -81.77184 | -82.82733 |
| 4.150 | -76.72873 | -77.88485 | -78.94937 |
| 4.200 | -72.81135 | -73.94717 | -75.01542 |
| 4.250 | -68.92362 | -70.02397 | -71.08867 |
| 4.300 | -65.11038 | -66.16502 | -67.21724 |
| 4.350 | -61.40448 | -62.40741 | -63.43730 |
| 4.400 | -57.83023 | -58.77774 | -59.77523 |
| 4.450 | -54.40302 | -55.29428 | -56.25001 |
| 4.500 | -51.13353 | -51.96878 | -52.87442 |
| 5.000 | -27.06190 | -27.44833 | -27.73187 |
| 5.250 | -19.79415 | -20.05656 | -20.12690 |
| 5.500 | -14.53330 | -14.82466 | -14.77415 |
| 5.750 | -10.88945 | -11.10243 | -11.00483 |
| 6.000 | -8.29645  | -8.42276  | -8.32428  |

|       |          |          |          |
|-------|----------|----------|----------|
| 6.500 | -4.93539 | -5.02182 | -4.96449 |
| 7.000 | -3.09306 | -3.12495 | -3.09745 |
| 7.500 | -1.99829 | -2.02015 | -2.00538 |
| 8.000 | -1.33188 | -1.34817 | -1.33972 |
| 9.000 | -0.63951 | -0.64789 | -0.64438 |

---

---

TABLE IV: HeNe interaction energies. See caption of Table I  
 for details.

| $R$   | daV5Z-33221 | fs-331    | apc2-3321 |
|-------|-------------|-----------|-----------|
| $n$   | 313         | 102       | 98        |
| 2.000 | 946.76033   | 982.39346 | 969.74356 |
| 2.150 | 439.22211   | 459.98968 | 452.17010 |
| 2.250 | 253.85717   | 268.10360 | 262.68991 |
| 2.350 | 139.94466   | 149.44978 | 145.95752 |
| 2.450 | 71.10188    | 77.14568  | 75.18108  |
| 2.500 | 48.03292    | 52.72667  | 51.38656  |
| 2.550 | 30.43692    | 33.99860  | 33.18902  |
| 2.600 | 17.13706    | 19.76347  | 19.38960  |
| 2.650 | 7.19798     | 9.06621   | 9.03467   |
| 2.700 | -0.12244    | 1.14500   | 1.36724   |
| 2.750 | -5.41174    | -4.60789  | -4.21227  |
| 2.800 | -9.13394    | -8.67726  | -8.17738  |
| 2.850 | -11.65470   | -11.44894 | -10.90124 |
| 2.875 | -12.55689   | -12.44656 | -11.89195 |
| 2.900 | -13.26125   | -13.22932 | -12.67692 |
| 2.925 | -13.79411   | -13.82558 | -13.28304 |
| 2.950 | -14.17863   | -14.26047 | -13.73406 |
| 2.975 | -14.43542   | -14.55626 | -14.05088 |
| 3.000 | -14.58240   | -14.73259 | -14.25205 |
| 3.005 | -14.60009   | -14.75506 | -14.27988 |
| 3.010 | -14.61414   | -14.77358 | -14.30386 |
| 3.015 | -14.62469   | -14.78831 | -14.32410 |
| 3.020 | -14.63182   | -14.79933 | -14.34074 |
| 3.025 | -14.63564   | -14.80675 | -14.35386 |
| 3.030 | -14.63628   | -14.81067 | -14.36360 |

|       |           |           |           |
|-------|-----------|-----------|-----------|
| 3.035 | -14.63387 | -14.81129 | -14.37004 |
| 3.040 | -14.62847 | -14.80861 | -14.37333 |
| 3.045 | -14.62013 | -14.80284 | -14.37350 |
| 3.050 | -14.60909 | -14.79397 | -14.37069 |
| 3.075 | -14.51500 | -14.70779 | -14.31521 |
| 3.100 | -14.36422 | -14.55990 | -14.19852 |
| 3.125 | -14.16612 | -14.36069 | -14.03040 |
| 3.150 | -13.92902 | -14.11922 | -13.81946 |
| 3.175 | -13.66010 | -13.84345 | -13.57328 |
| 3.200 | -13.36563 | -13.54031 | -13.29832 |
| 3.225 | -13.05106 | -13.21591 | -13.00040 |
| 3.250 | -12.72108 | -12.87555 | -12.68449 |
| 3.275 | -12.37980 | -12.52368 | -12.35497 |
| 3.300 | -12.03070 | -12.16443 | -12.01560 |
| 3.325 | -11.67686 | -11.80100 | -11.66964 |
| 3.350 | -11.32081 | -11.43630 | -11.32160 |
| 3.375 | -10.96471 | -11.07278 | -10.96877 |
| 3.400 | -10.61048 | -10.71238 | -10.61825 |
| 3.425 | -10.25963 | -10.35672 | -10.27018 |
| 3.450 | -9.91347  | -10.00708 | -9.92594  |
| 3.475 | -9.57307  | -9.66452  | -9.58674  |
| 3.500 | -9.23929  | -9.32978  | -9.25358  |
| 3.550 | -8.59432  | -8.68599  | -8.60854  |
| 3.600 | -7.98251  | -8.07844  | -7.99553  |
| 3.650 | -7.40595  | -7.50812  | -7.41717  |
| 3.750 | -6.36108  | -6.47760  | -6.36830  |
| 3.850 | -5.45634  | -5.58618  | -5.46031  |
| 4.000 | -4.33642  | -4.48277  | -4.33827  |
| 4.150 | -3.45712  | -3.61806  | -3.45975  |
| 4.300 | -2.76975  | -2.94366  | -2.77455  |

|       |          |          |          |
|-------|----------|----------|----------|
| 4.500 | -2.08018 | -2.26529 | -2.08712 |
| 4.750 | -1.47801 | -1.66397 | -1.48332 |
| 5.000 | -1.06904 | -1.24598 | -1.07062 |
| 5.250 | -0.78631 | -0.94991 | -0.78629 |
| 5.500 | -0.58740 | -0.73377 | -0.58824 |

---

---

TABLE V: HeAr interaction energies. See caption of Table I  
 for details.

| $R$   | daV5Z-33221 | ds-3321    | apc2-33211 |
|-------|-------------|------------|------------|
| $n$   | 317         | 92         | 111        |
| 2.250 | 1771.89612  | 1861.35988 | 1822.78840 |
| 2.375 | 1036.90793  | 1097.37541 | 1071.58525 |
| 2.500 | 590.64442   | 630.83360  | 613.90403  |
| 2.625 | 323.49257   | 349.67069  | 338.81938  |
| 2.750 | 166.32979   | 182.95177  | 176.24199  |
| 2.875 | 75.95525    | 86.16190   | 82.22534   |
| 3.000 | 25.61493    | 31.60046   | 29.45453   |
| 3.100 | 2.90045     | 6.62607    | 5.40028    |
| 3.200 | -10.11971   | -7.94233   | -8.57217   |
| 3.250 | -14.14960   | -12.54214  | -12.96412  |
| 3.275 | -15.69542   | -14.33095  | -14.66681  |
| 3.300 | -16.97496   | -15.82838  | -16.08854  |
| 3.325 | -18.01856   | -17.06692  | -17.26082  |
| 3.350 | -18.85359   | -18.07586  | -18.21185  |
| 3.375 | -19.50464   | -18.88151  | -18.96715  |
| 3.400 | -19.99374   | -19.50763  | -19.54964  |
| 3.425 | -20.34069   | -19.97551  | -19.97992  |
| 3.450 | -20.56321   | -20.30430  | -20.27647  |
| 3.475 | -20.67708   | -20.51118  | -20.45587  |
| 3.480 | -20.68805   | -20.53931  | -20.47900  |
| 3.485 | -20.69545   | -20.56332  | -20.49821  |
| 3.490 | -20.69922   | -20.58327  | -20.51355  |
| 3.495 | -20.69953   | -20.59934  | -20.52511  |
| 3.500 | -20.69650   | -20.61156  | -20.53301  |
| 3.505 | -20.69018   | -20.62008  | -20.53738  |

|       |           |           |           |
|-------|-----------|-----------|-----------|
| 3.510 | -20.68070 | -20.62506 | -20.53830 |
| 3.515 | -20.66810 | -20.62649 | -20.53580 |
| 3.520 | -20.65258 | -20.62454 | -20.53014 |
| 3.525 | -20.63417 | -20.61929 | -20.52123 |
| 3.550 | -20.50130 | -20.54669 | -20.43247 |
| 3.575 | -20.30810 | -20.40478 | -20.27739 |
| 3.600 | -20.06340 | -20.20352 | -20.06549 |
| 3.625 | -19.77523 | -19.95163 | -19.80530 |
| 3.650 | -19.45065 | -19.65694 | -19.50436 |
| 3.675 | -19.09592 | -19.32648 | -19.16938 |
| 3.700 | -18.71651 | -18.96638 | -18.80636 |
| 3.725 | -18.31744 | -18.58208 | -18.42057 |
| 3.750 | -17.90294 | -18.17849 | -18.01665 |
| 3.775 | -17.47676 | -17.75980 | -17.59879 |
| 3.800 | -17.04227 | -17.32983 | -17.17049 |
| 3.825 | -16.60236 | -16.89182 | -16.73496 |
| 3.850 | -16.15961 | -16.44866 | -16.29498 |
| 3.875 | -15.71612 | -16.00284 | -15.85294 |
| 3.900 | -15.27385 | -15.55658 | -15.41092 |
| 3.925 | -14.83440 | -15.11168 | -14.97072 |
| 3.950 | -14.39918 | -14.66979 | -14.53390 |
| 3.975 | -13.96941 | -14.23229 | -14.10171 |
| 4.000 | -13.54602 | -13.80037 | -13.67538 |
| 4.050 | -12.72172 | -12.95688 | -12.84359 |
| 4.100 | -11.93123 | -12.14537 | -12.04433 |
| 4.150 | -11.17782 | -11.36969 | -11.28133 |
| 4.250 | -9.78846  | -9.93412  | -9.87186  |
| 4.350 | -8.55648  | -8.65615  | -8.62079  |
| 4.500 | -6.98665  | -7.02220  | -7.02718  |
| 4.650 | -5.71174  | -5.69352  | -5.73553  |

|       |          |          |          |
|-------|----------|----------|----------|
| 4.800 | -4.68333 | -4.62514 | -4.69643 |
| 5.000 | -3.61729 | -3.52970 | -3.62241 |
| 5.500 | -1.96996 | -1.89470 | -1.97099 |
| 6.000 | -1.13328 | -1.09094 | -1.13633 |
| 6.500 | -0.68434 | -0.65695 | -0.68702 |

---

---



TABLE VI: NeAr interaction energies. See caption of Table I  
 for details.

| $R$   | daV5Z-33221 | ds-3321    | apc2-3321  |
|-------|-------------|------------|------------|
| $n$   | 375         | 120        | 125        |
| 2.500 | 1376.60701  | 1469.25092 | 1437.07223 |
| 2.600 | 850.12447   | 915.28357  | 892.07184  |
| 2.750 | 384.27657   | 422.04339  | 407.82600  |
| 2.875 | 175.51204   | 199.11153  | 189.66752  |
| 3.000 | 59.97912    | 74.40350   | 68.23473   |
| 3.100 | 8.13560     | 17.56462   | 13.31722   |
| 3.200 | -21.44680   | -15.59736  | -18.37310  |
| 3.250 | -30.57170   | -26.10791  | -28.28681  |
| 3.275 | -34.06591   | -30.21068  | -32.12182  |
| 3.300 | -36.95536   | -33.65687  | -35.31957  |
| 3.325 | -39.30925   | -36.51988  | -37.95228  |
| 3.350 | -41.19078   | -38.86547  | -40.08500  |
| 3.375 | -42.65597   | -40.75280  | -41.77610  |
| 3.400 | -43.75534   | -42.23486  | -43.07771  |
| 3.425 | -44.53406   | -43.35928  | -44.03684  |
| 3.450 | -45.03242   | -44.16868  | -44.69553  |
| 3.475 | -45.28637   | -44.70132  | -45.09135  |
| 3.480 | -45.31093   | -44.77770  | -45.14198  |
| 3.485 | -45.32711   | -44.84466  | -45.18372  |
| 3.490 | -45.33534   | -44.90242  | -45.21684  |
| 3.495 | -45.33575   | -44.95124  | -45.24151  |
| 3.500 | -45.32856   | -44.99140  | -45.25804  |
| 3.505 | -45.31392   | -45.02303  | -45.26658  |
| 3.510 | -45.29252   | -45.04647  | -45.26741  |
| 3.515 | -45.26405   | -45.06189  | -45.26074  |

|       |           |           |           |
|-------|-----------|-----------|-----------|
| 3.520 | -45.22894 | -45.06951 | -45.24678 |
| 3.525 | -45.18724 | -45.06955 | -45.22573 |
| 3.550 | -44.88807 | -44.96320 | -45.02140 |
| 3.575 | -44.45424 | -44.69689 | -44.66914 |
| 3.600 | -43.90550 | -44.29246 | -44.19038 |
| 3.625 | -43.25981 | -43.76954 | -43.60432 |
| 3.650 | -42.53368 | -43.14555 | -42.92788 |
| 3.675 | -41.74056 | -42.43606 | -42.17624 |
| 3.700 | -40.89317 | -41.65499 | -41.36280 |
| 3.725 | -40.00250 | -40.81480 | -40.49939 |
| 3.750 | -39.07792 | -39.92645 | -39.59652 |
| 3.775 | -38.12845 | -38.99981 | -38.66335 |
| 3.800 | -37.16109 | -38.04362 | -37.70791 |
| 3.825 | -36.18239 | -37.06571 | -36.73738 |
| 3.850 | -35.19800 | -36.07294 | -35.75784 |
| 3.875 | -34.21287 | -35.07143 | -34.77466 |
| 3.900 | -33.23092 | -34.06668 | -33.79244 |
| 3.925 | -32.25641 | -33.06344 | -32.81512 |
| 3.950 | -31.29179 | -32.06588 | -31.84610 |
| 3.975 | -30.33978 | -31.07765 | -30.88829 |
| 4.000 | -29.40288 | -30.10202 | -29.94407 |
| 4.050 | -27.58105 | -28.19880 | -28.10419 |
| 4.100 | -25.83647 | -26.37337 | -26.33858 |
| 4.150 | -24.17656 | -24.63726 | -24.65499 |
| 4.200 | -22.60472 | -22.99734 | -23.05772 |
| 4.250 | -21.12230 | -21.45685 | -21.54872 |
| 4.300 | -19.72877 | -20.01584 | -20.12786 |
| 4.350 | -18.42228 | -18.67216 | -18.79383 |
| 4.500 | -14.99409 | -15.18189 | -15.28531 |
| 4.650 | -12.22406 | -12.38662 | -12.44162 |

|       |          |           |           |
|-------|----------|-----------|-----------|
| 4.800 | -9.99562 | -10.13896 | -10.15595 |
| 5.000 | -7.70887 | -7.79271  | -7.80050  |
| 5.500 | -4.16234 | -4.13003  | -4.20513  |
| 6.000 | -2.38518 | -2.33420  | -2.40786  |
| 6.500 | -1.43466 | -1.41166  | -1.45479  |

---

---
